# Supplementary material for: Bioinformatics prediction and experimental verification of key biomarkers for diabetic kidney disease based on transcriptome sequencing in mice
Source: PeerJ. 2022 Sep 20;10:e13932. doi: 10.7717/peerj.13932 (PMC9504448; doi:10.7717/peerj.13932)
Supplement: Table S2 [file peerj-10-13932-s002.docx]

Supplementary Table 2

| Primer | Sequence (5’-3’) | |
| --- | --- | --- |
| mus-Aacs-F | CCAGCACCTGAAGGAGCACATG |
| mus-Aacs-R | GACACCATCCAGTTCCACATCATCC |
| mus-β-actin-F | CTACCTCATGAAGATCCTGACC |
| mus-β-actin-R | CACAGCTTCTCTTTGATGTCAC |
| mus-Abcc4-F | CGGATCGGCACCATGACACTTC |
| mus-Abcc4-R | AAGGATTTCACCAACGGCTCACAG |
| mus-Fmo5-F | CGTGTTCGGAAGCCTCTGATGAC |
| mus-Fmo5-R | AGCCAGGATGACAGCAAAGAAAGC |
| mus-Apoh-F | GCAGAGATGGCACTATCGAGATTCC |
| mus-Apoh-R | CGACTTCAGCACGGTGTCAGTTC |
| mus-Akr1c14-F | TGCACATTGGGAAGTTCACGAGAC |
| mus-Akr1c14-R | CACGCTGTAATTGGTAACGAATGGC |
| mus-Lpl-F | CGCTCTCAGATGCCCTACAAAGTG |
| mus-Lpl-R | TTGTGTTGCTTGCCATCCTCAGTC |
| mus-Cpe-F | CCGAGACCAAGGCTGTCATTCAC |
| mus-Cpe-R | CGTCATCAGGGCAGGAACTGTATTC |
| mus-Kynu-F | GTCTTGCATTTCACCACGCTTTCTC |
| mus-Kynu-R | ACGCTGAGTGCTAAGTTGATGTCTG |
| mus-Cyp7b1-F | GCCTCTCTAGCAAACACCATTCCAG |
| mus-Cyp7b1-R | AATTTCGTCACGCAGGGCTTCC |
| mus-Gsta2-F | CCCAGACCAAAGAGAAGCCAAGAC |
| mus-Gsta2-R | GCCTGTTGCCCACAAGGTAGTC |
| mus-Slc1a4-F | GGAAGACACCACCACAACTGACTG |
| mus-Slc1a4-R | CAGGCTTGATGGCTGTGCTACG |
| mus-Cd36-F | TGATACTATGCCCGCCTCTCCTG |
| mus-Cd36-R | CATCGTTTCCCACACTCCTTTCTCC |
| mus-Slc22a7-F | GAAGCAGCCTTTACTACAGCCTACC |
| mus-Slc22a7-R | GCCACACTCCATCCAGCAAGAC |
